# Supplementary material for: Incidence trends for twelve cancers in younger adults—a rapid review
Source: PubMed Central journal article supplement (PMC9090760; doi:10.1038/s41416-022-01704-x), 2022-02-07
Supplement: 41416_2022_1704_MOESM2_ESM.pdf [file 41416_2022_1704_MOESM2_ESM.pdf]

## Supplementary Figure 1

|                      |         |                |                |                |                |                |
|----------------------|---------|----------------|----------------|----------------|----------------|----------------|
| not reported         | > -5.01 | -4.01 to -5.00 | -3.01 to -4.00 | -2.01 to -3.00 | -1.01 to -2.00 | -0.01 to -1.00 |
| non significant (ns) | > 5.01  | 4.01 to 5.00   | 3.01 to 4.00   | 2.01 to 3.00   | 1.01 to 2.00   | 0.01 to 1.00   |

A.

| STOMACH CANCER                              |             | AGE GROUP  |           |           |            |            |           |           |       |            |           |           |       |            |
|---------------------------------------------|-------------|------------|-----------|-----------|------------|------------|-----------|-----------|-------|------------|-----------|-----------|-------|------------|
|                                             |             | 20-24      | 25-29     | 30-34     | 35-39      | 40-44      | 45-49     | 50-54     | 55-59 | 60-64      | 65-69     | 70-74     | 75-79 | 80-84      |
| <b>Studies set in the US</b>                |             |            |           |           |            |            |           |           |       |            |           |           |       |            |
| Hussan et al., 2020                         |             | 0.7        |           |           |            |            | -0.5 (ns) |           |       | -1.1       |           | -1.8      |       |            |
| Kehm et al., 2019                           | male        | 0.20 (ns)  |           |           | -0.06 (ns) |            |           | -1.71     |       | -1.77      |           |           |       |            |
|                                             | female      | 1.98       |           |           | 1.16       |            |           | -1.31     |       | -1.64      |           |           |       |            |
| Merchant et al., 2017                       |             | 0.33 (ns)  |           |           |            |            | -2.28     |           |       | -2.56      |           |           |       |            |
| <b>Non-cardia adenocarcinoma</b>            |             |            |           |           |            |            |           |           |       |            |           |           |       |            |
| Anderson et al., 2010                       | GNCA White  | 2.7        |           |           | -0.8       |            |           | -1.8      |       |            |           |           |       |            |
|                                             | GNCA Black  | -1.7 (ns)  |           |           | -2.1       |            |           | -1.4      |       |            |           |           |       |            |
| Anderson et al., 2018                       | GNCA NHW    | 1.3        |           |           |            |            | -2.6      |           |       |            |           |           |       |            |
| Islami et al., 2019                         | GNCA Male   | 1.3        |           |           | 0 (ns)     |            |           | 0.8 (ns)  |       | -2.5       |           | -2.8      |       |            |
|                                             | GNCA Female | 2.9        |           |           | 2.5        |            |           | 0.8       |       | -1.5       |           | -2.5      |       |            |
| Sung et al., 2019                           | GNCA        | 1.6        | 2.16      | 1.7       | 1.77       | 1.14       | 0.58      | -0.75     | -1.53 | -1.73      | -1.63     | -1.82     | -2.09 |            |
| Wang et al., 2020                           | GNCA NHW    | 1.24       |           |           |            |            | -2.28     |           |       |            |           |           |       |            |
| <b>Adenocarcinoma of the gastric cardia</b> |             |            |           |           |            |            |           |           |       |            |           |           |       |            |
| Islami et al., 2019                         | GCA Male    | 0.3 (ns)   |           |           | -0.1 (ns)  |            |           | 2.3       |       | 1.0        |           | 0.3       |       |            |
|                                             | GCA Female  | 0.3 (ns)   |           |           | 1.9        |            |           | 0.5 (ns)  |       | 0.6 (ns)   |           | 0.4 (ns)  |       |            |
| Sung et al., 2019                           | GCA         | 0.05 (ns)  | 0.94 (ns) | 0.13 (ns) | -0.15 (ns) | -0.22 (ns) | -0.45     | -0.64     | -0.52 | -0.19 (ns) | 0.10 (ns) | 0.30 (ns) | 0.91  |            |
| <b>Studies set in Canada</b>                |             |            |           |           |            |            |           |           |       |            |           |           |       |            |
| Brenner et al., 2020                        | male        | -0.42 (ns) |           |           | 0.84 (ns)  |            |           | 3.05      |       | -2.37      |           | -1.82     |       | -0.56 (ns) |
|                                             | female      | -0.8       |           |           | 0.23 (ns)  |            |           | 0.83 (ns) |       | 9.74 (ns)  |           | -2.46     |       | -9.23      |
| Heer et al., 2020                           |             | 2.03       | 0.51 (ns) | 0.24 (ns) | 0.01 (ns)  | -0.71      | -1.49     | -2.05     | -2.24 | -2.25      | -2.21     | -2.10     | -2.17 | -2.50      |
| <b>Studies set in Asia</b>                  |             |            |           |           |            |            |           |           |       |            |           |           |       |            |
| Song et al., 2015 (S. Korea)                | male        | -3.7       |           |           | 0.2 (ns)   |            |           | -0.1 (ns) |       | -0.5 (ns)  |           |           |       |            |
|                                             | female      | -0.8 (ns)  |           |           | 1.7        |            |           | -1.1      |       | -1.0       |           |           |       |            |

GNCA: Gastric Non-Cardia Adenocarcinoma; GCA: Adenocarcinoma of the Gastric Cardia

**B.**

| OESOPHAGEAL CANCER             |             | AGE GROUP |            |            |           |            |       |            |       |          |       |           |           |            |       |  |
|--------------------------------|-------------|-----------|------------|------------|-----------|------------|-------|------------|-------|----------|-------|-----------|-----------|------------|-------|--|
|                                |             | 20-24     | 25-29      | 30-34      | 35-39     | 40-44      | 45-49 | 50-54      | 55-59 | 60-64    | 65-69 | 70-74     | 75-79     | 80-84      | 85-89 |  |
| <b>Studies set in the US</b>   |             |           |            |            |           |            |       |            |       |          |       |           |           |            |       |  |
| Hussan et al., 2020            |             | -1.8      |            |            |           | -1.1       |       |            |       | -1.2     |       |           | -0.7 (ns) |            |       |  |
| <b>Adenocarcinoma</b>          |             |           |            |            |           |            |       |            |       |          |       |           |           |            |       |  |
| Anderson et al., 2018          | OAC NHW     | 1.3       |            |            |           |            |       | 1.9        |       |          |       |           |           |            |       |  |
| Islami et al., 2019            | OAC Male    | 0.9 (ns)  |            |            |           | -1.0 (ns)  |       | -1.0       |       | -1.4     |       | -0.4 (ns) |           |            |       |  |
|                                | OAC Female  |           |            |            |           | 2.4        |       | 1.3        |       | 0.5 (ns) |       | 1.4 (ns)  |           |            |       |  |
| Sung et al., 2019              | OAC         | 1.90 (ns) | 1.42 (ns)  | 0.61 (ns)  | 0.38 (ns) | 0.17 (ns)  | 0.3   | 0.93       | 1.44  | 1.47     | 1.45  | 1.77      | 2.28      |            |       |  |
| Trivers et al., 2008           | OAC         | 2.7 (ns)  |            |            |           | 1.8 (ns)   |       |            |       | 1.9      |       |           | 2.7       |            |       |  |
| <b>Squamous cell carcinoma</b> |             |           |            |            |           |            |       |            |       |          |       |           |           |            |       |  |
| Sung et al., 2019              | OSSC        |           | -1.96 (ns) | -4.84      | -4.49     | -3.46      | -3.1  | -3.73      | -4.37 | -3.99    | -3.42 | -2.44     | -1.9      |            |       |  |
| Trivers et al., 2009           | OSSC        | -3.4(ns)  |            |            |           | -3.7       |       |            |       | -4.1     |       |           | -2.6      |            |       |  |
| Polednak et al., 2005          | OSSC male   | -3.9      |            |            |           |            |       |            |       |          |       |           |           |            |       |  |
|                                | OSSC female | -5.2      |            |            |           |            |       |            |       |          |       |           |           |            |       |  |
| Islami et al., 2019            | OSSC Male   |           |            |            |           | -4.7       |       | -2.0       |       | -3.8     |       | -3.0      |           |            |       |  |
|                                | OSSC Female |           |            |            |           | -2.5       |       | 2.1 (ns)   |       | 0 (ns)   |       | -2.5      |           |            |       |  |
| <b>Studies set in Canada</b>   |             |           |            |            |           |            |       |            |       |          |       |           |           |            |       |  |
| Heer et al., 2020              |             | 0.20 (ns) | 2.57 (ns)  | 2.27       | 1.63      | 1.32       | 0.99  | 0.54       | 0.40  | 0.26     | 0.38  | 0.44      | 0.72      | 0.70       |       |  |
| Brenner et al., 2020           | male        | -0.59     |            | -0.21 (ns) |           | 0.74       |       | 0.59       |       | 0.53     |       | 0.53      |           | -6.06 (ns) |       |  |
|                                | female      | -1.27     |            | -0.93      |           | -0.47 9ns) |       | -0.26 (ns) |       | -0.34    |       | -0.42     |           | -6.31      |       |  |
| <b>Studies set in Europe</b>   |             |           |            |            |           |            |       |            |       |          |       |           |           |            |       |  |
| Gilhodes et al., 2015          | men         | -6.24     |            |            |           |            |       |            |       |          |       |           |           |            |       |  |

OAC: oesophageal Adenocarcinoma; OSSC: Oesophageal Squamous Cell Carcinoma

**C.**

| OVARIAN CANCER *             |  | AGE GROUPS |            |       |       |          |       |       |       |       |       |       |       |            |       |  |  |
|------------------------------|--|------------|------------|-------|-------|----------|-------|-------|-------|-------|-------|-------|-------|------------|-------|--|--|
|                              |  | 20-24      | 25-29      | 30-34 | 35-39 | 40-44    | 45-49 | 50-54 | 55-59 | 60-64 | 65-69 | 70-74 | 75-79 | 80-84      | 85-89 |  |  |
| <b>Studies set in the US</b> |  |            |            |       |       |          |       |       |       |       |       |       |       |            |       |  |  |
| Kehm et al., 2019            |  | 0.04 (ns)  |            |       |       | -0.87    |       |       |       | -2.01 |       |       | -1.35 |            |       |  |  |
| Sung et al., 2019            |  | -0.26 (ns) | -0.54 (ns) | -1.01 | -1.35 | -1.63    | -1.94 | -2.18 | -2.2  | -1.91 | -1.87 | -1.85 | -1.4  |            |       |  |  |
| Ward et al., 2019            |  | -0.7       |            |       |       |          |       |       |       |       |       |       |       |            |       |  |  |
| <b>Studies set in Canada</b> |  |            |            |       |       |          |       |       |       |       |       |       |       |            |       |  |  |
| Brenner et al., 2020         |  | 2.31       |            | -1.21 |       | 0.7 (ns) |       | -1.15 |       | -1.04 |       | -0.68 |       | -7.53      |       |  |  |
| Heer et al., 2020            |  | 0.11 (ns)  | -0.8       | -0.6  | -0.91 | -0.72    | -0.97 | -1.14 | -1.23 | -1.19 | -1.05 | -0.86 | -0.58 | -0.26 (ns) |       |  |  |
| <b>Studies set in Asia</b>   |  |            |            |       |       |          |       |       |       |       |       |       |       |            |       |  |  |
| Kim et al., 2016 (S. Korea)  |  | 1.87       |            |       |       | 2.48     |       |       |       | 3.02  |       |       |       |            |       |  |  |
