# Supplementary material for: Incidence trends for twelve cancers in younger adults—a rapid review
Source: PubMed Central journal article supplement (PMC9090760; doi:10.1038/s41416-022-01704-x), 2022-02-07
Supplement: 41416_2022_1704_MOESM3_ESM.pdf [file 41416_2022_1704_MOESM3_ESM.pdf]

# Supplementary Figure 2

A.

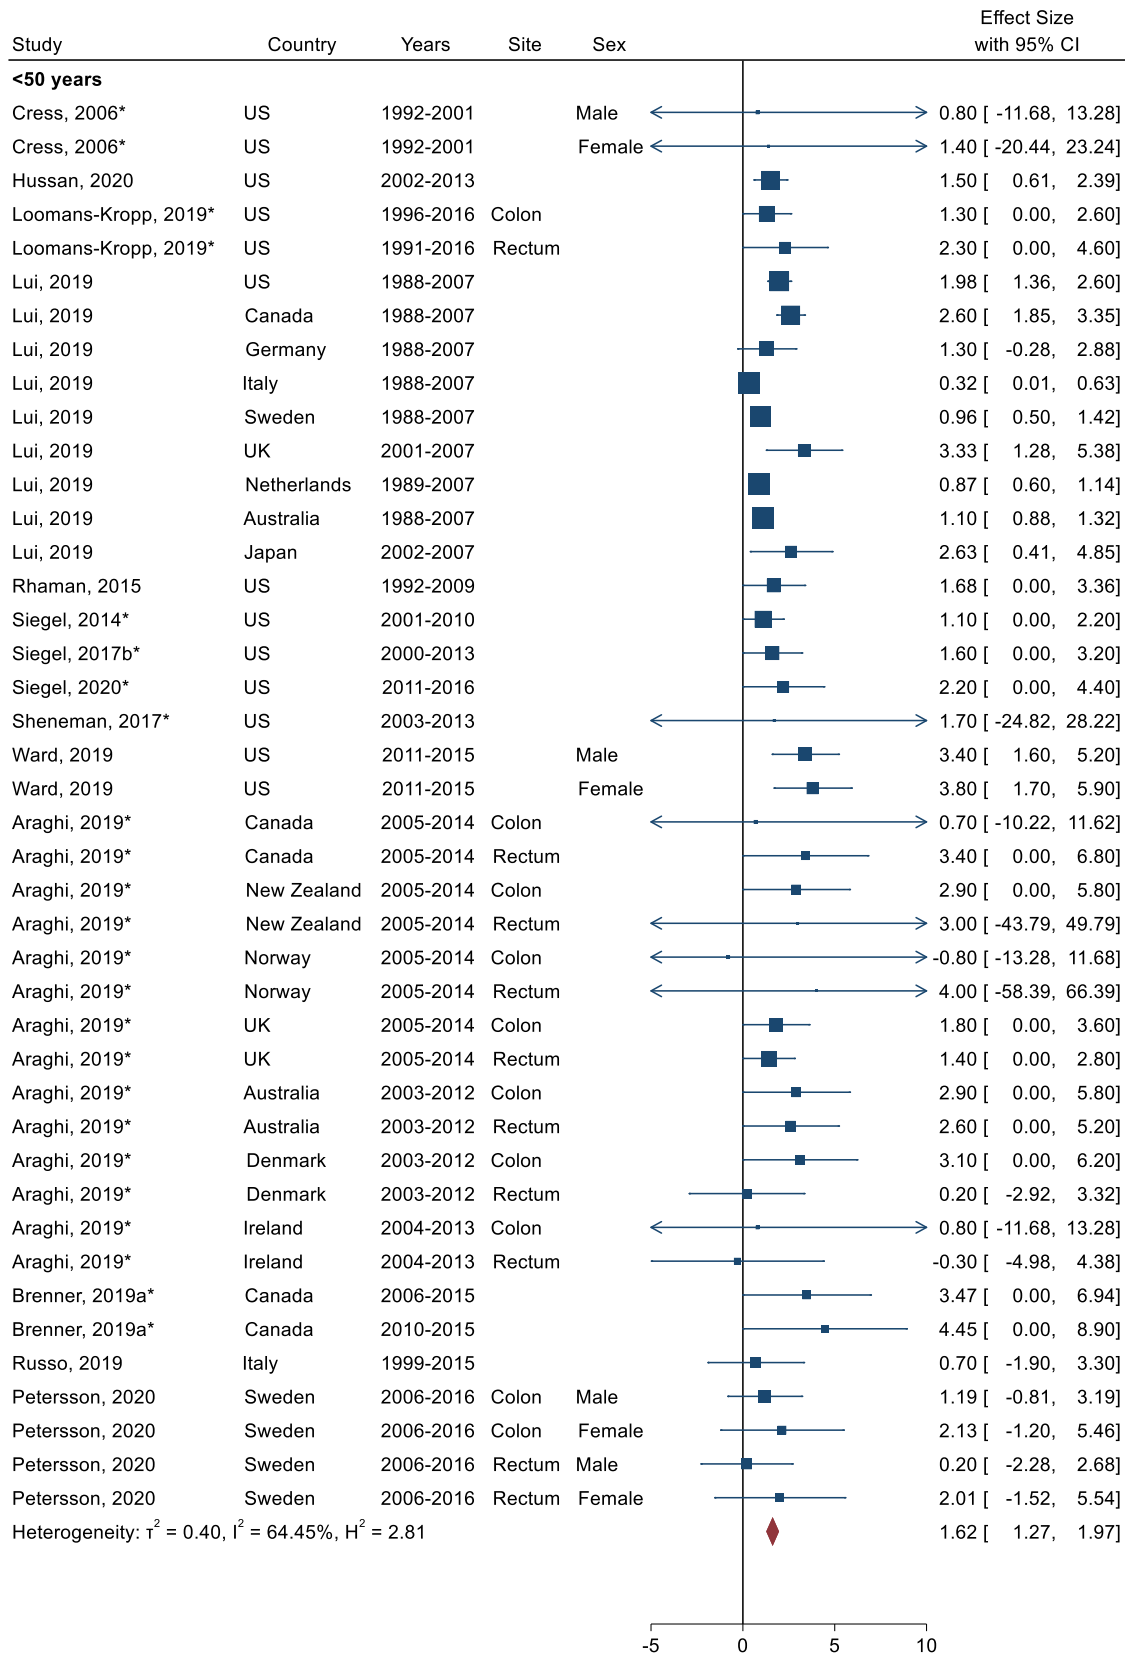

Random-effects REML model

## B.

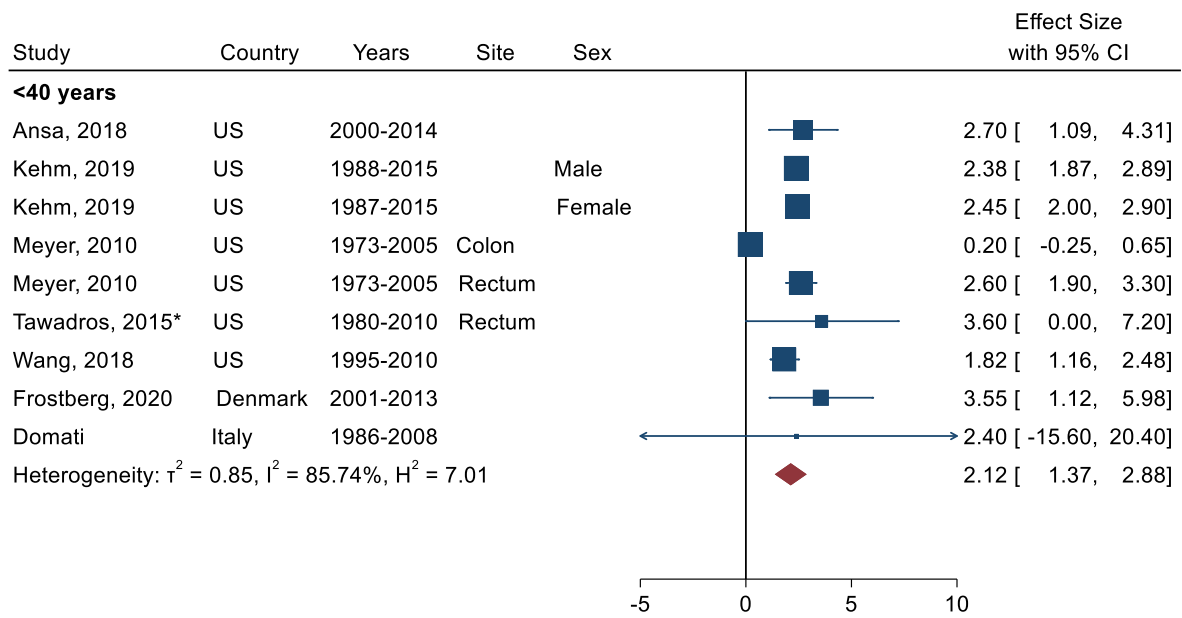

Random-effects REML model

### C.

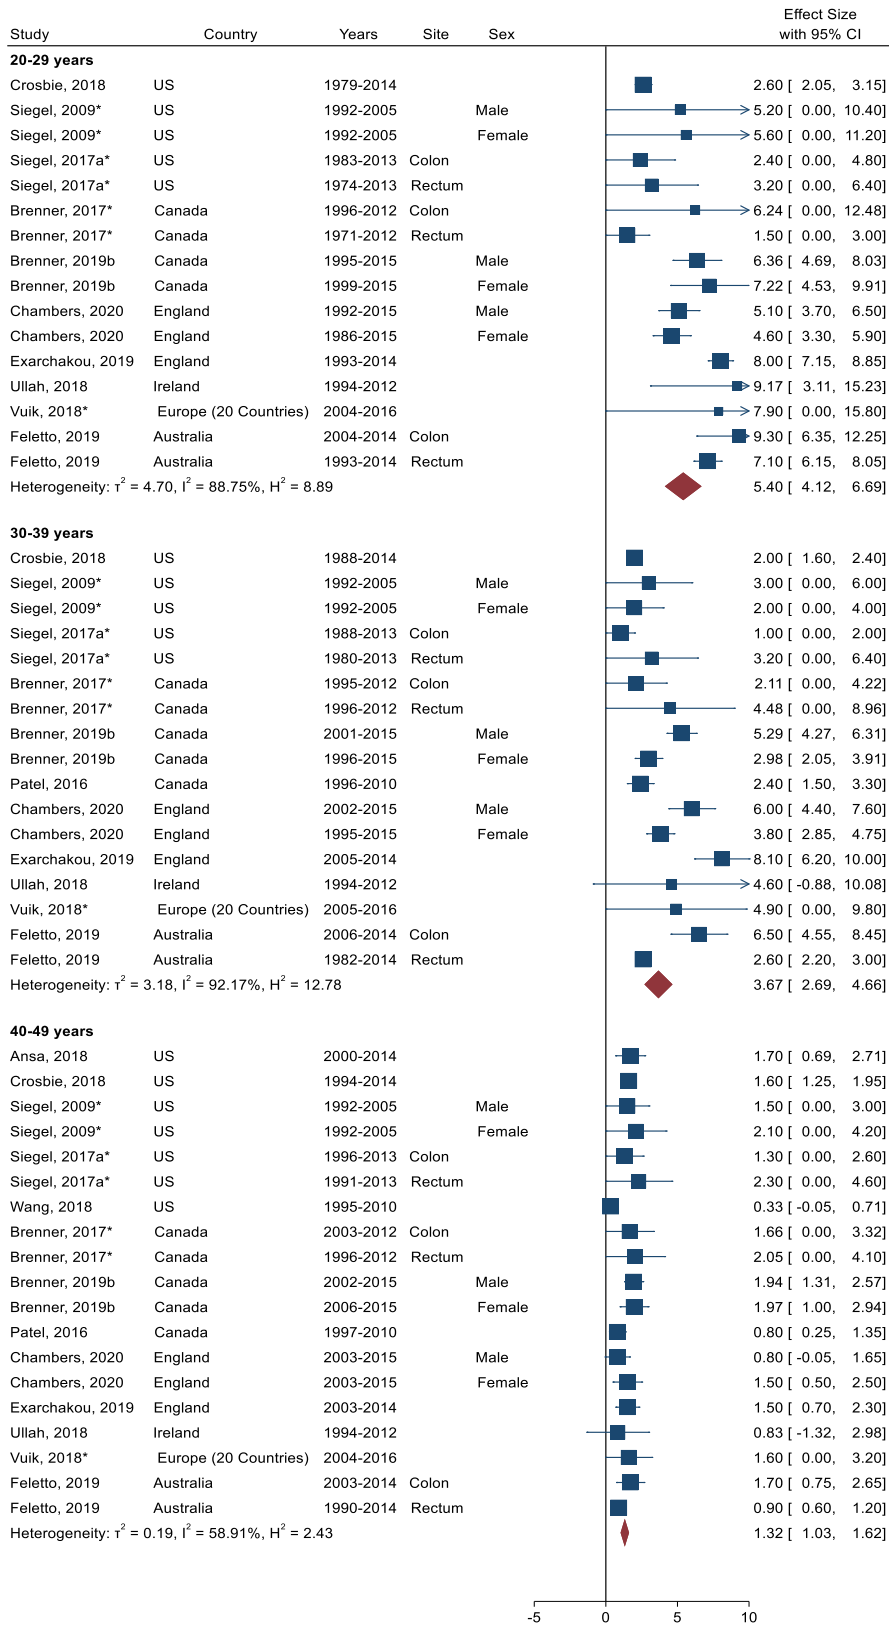

Random-effects REML model
